# Supplementary material for: Safety and Efficacy upon Infection in Sheep with Rift Valley Fever Virus ZH548-rA2, a Triple Mutant Rescued Virus
Source: MDPI journal article supplement (doi:10.3390/v16010087), 2024-01-05
Supplement: s1 [file s1]

## IFNg ELISA

|           | sheep # |           |       |       |
|-----------|---------|-----------|-------|-------|
|           | 39      | 40        | 768   | 909   |
| d0        | 0,053   | 0,101 n.d | n.d   |       |
| d2        | 0,053   | 0,099 n.d | n.d   |       |
| d4        | 0,096   | 0,174 n.d | n.d   |       |
| d7        | 0,079   | 0,115 n.d | n.d   |       |
| d14       | 0,051   | 0,09 n.d  | n.d   |       |
| d21       | 0,05    | 0,09 n.d  | n.d   |       |
| d1 postch | 0,06    | 0,13      | 0,227 | 0,251 |
| d2 postch | 0,07    | 0,171     | 0,07  | 0,214 |
| d3 postch | 0,104   | 0,179     | 0,221 | 0,747 |
| d4 postch | 0,043   | 0,1 n.a   |       | 0,923 |

## Biochemistry

|     | sheep # |     |    |     |
|-----|---------|-----|----|-----|
| AST | 909     | 768 | 39 | 40  |
| 0   | 348     | 264 | 82 | 111 |
| 1   | 277     | 457 | 87 | 94  |
| 2   | 269     | 380 | 91 | 98  |
| 3   | 260     | 330 | 87 | 92  |
| 4   | 282 n.a | n.a |    | 95  |

|     | sheep # |     |    |    |
|-----|---------|-----|----|----|
| BUN | 909     | 768 | 39 | 40 |
| 0   | 21      | 20  | 15 | 15 |
| 1   | 19      | 28  | 25 | 22 |
| 2   | 22      | 27  | 30 | 29 |
| 3   | 21      | 29  | 26 | 21 |
| 4   | 23      |     |    | 22 |

## Temperatures

|                       | sheep # |      |      |      |
|-----------------------|---------|------|------|------|
| days post-inoculation | 39      | 40   | 73   | 83   |
| -3                    | 39,8    | 39,5 | 40   | 40,2 |
| -2                    | 39,9    | 40,3 | 40   | 39,7 |
| -1                    | 39,3    | 39,4 | 39,9 | 39,1 |
| 0                     | 40,2    | 39,7 | 39,9 | 39,8 |
| 1                     | 40,3    | 39,9 | 40,2 | 40,3 |
| 2                     | 40      | 39,8 | 40   | 39,9 |
| 3                     | 39,8    | 39,8 | 39,9 | 39,5 |
| 4                     | 40      | 39,4 | 39,2 | 39,8 |
| 5                     | 40,3    | 39,6 | 39,8 | 39,4 |
| 6                     | 40      | 39,9 | 39,8 | 39,5 |
| 7                     | 39,7    | 39,4 | 40   | 39,7 |

**restimulation proteins**

| sheep # | d7    |       | d14   |       | d21   |
|---------|-------|-------|-------|-------|-------|
|         | 39    | 40    | 39    | 40    | 39    |
|         | 0,255 | 0,084 | 0,184 | 0,404 | 0,908 |
|         | 0,127 | 0,177 | 0,213 | 0,203 | 1     |
|         | 0,129 | 0,077 | 0,083 | 0,107 | 0,118 |

**SNT**

|                | sheep #  |         |         |         |
|----------------|----------|---------|---------|---------|
| day            | 39       | 40      | 73      | 83      |
| 2              | 1,477121 | 1,30103 |         |         |
| 3              | 1,60206  | 1,30103 |         |         |
| 4              | 2        | 1,69897 |         |         |
| 5              | 2,30103  | 2       |         |         |
| 7              | 2,30103  | 2       | 2,60206 | 2,30103 |
| 14             | 2,60206  | 2,30103 |         |         |
| 21             | 2,60206  | 2,30103 |         |         |
| post-challenge | 3,50515  | 3,50515 |         |         |

|     | sheep # |     |    |    |
|-----|---------|-----|----|----|
| GGT | 909     | 768 | 39 | 40 |
| 0   | 62      | 55  | 48 | 85 |
| 1   | 64      | 61  | 58 | 72 |
| 2   | 57      | 58  | 62 | 78 |
| 3   | 59      | 53  | 54 | 71 |
| 4   | 63      |     |    | 73 |

|     | sheep # |     |     |     |
|-----|---------|-----|-----|-----|
| ALB | 909     | 768 | 39  | 40  |
| 0   | 3,9     | 3,3 | 4   | 3,6 |
| 1   | 4,1     | 3,9 | 3,7 | 4   |
| 2   | 4,2     | 3,7 | 3,8 | 4,2 |
| 3   | 4,1     | 3,5 | 3,6 | 4   |
| 4   | 4       |     |     | 4   |

|                     | sheep # |      |      |      |
|---------------------|---------|------|------|------|
| days post challenge | 909     | 768  | 39   | 40   |
| -5                  | 39,2    | 39,6 | 39,6 | 39,2 |
| -4                  | 39,4    | 39   | 39,6 | 39,1 |
| -3                  | 39      | 39,2 | 39,6 | 39   |
| -2                  | 39,2    | 39,3 | 39,5 | 39,2 |
| -1                  | 39,1    | 39,3 | 39,5 | 39   |
| 0                   | 39,8    | 39,1 | 39,3 | 39,1 |
| 1                   | 39,6    | 39,7 | 39,7 | 39,3 |
| 2                   | 39,9    | 40,1 | 39,4 | 39,3 |
| 3                   | 40,4    | 39,9 | 39,5 | 39,3 |
| 4                   | 41,3    |      |      | 39,1 |

|    |       | restimulation peptides |       |       |       |
|----|-------|------------------------|-------|-------|-------|
| p1 |       | d7                     |       | d14   |       |
|    |       | sheep #                |       |       |       |
|    | 40    | 39                     | 40    | 39    | 40    |
|    | 0,764 | 0,097                  | 0,085 | 0,119 | 0,082 |
|    | 0,509 | 0,146                  | 0,132 | 0,13  | 0,906 |
|    | 0,1   | 0,12                   | 0,125 | 0,12  | 0,127 |
|    |       | 0,131                  | 0,089 | 0,115 | 0,124 |
|    |       | 0,156                  | 0,189 | 0,288 | 0,133 |



| d21   |       |
|-------|-------|
| 39    | 40    |
| 0,157 | 0,182 |
| 0,337 | 0,665 |
| 0,502 | 1     |
| 0,606 | 0,277 |
| 1     | 1     |
